# Supplementary material for: Sedentary lifestyle, physical activity, and gastrointestinal diseases: evidence from mendelian randomization analysis
Source: PubMed Central journal article supplement (PMC11004085; doi:10.1016/j.ebiom.2024.105110), 2024-04-06

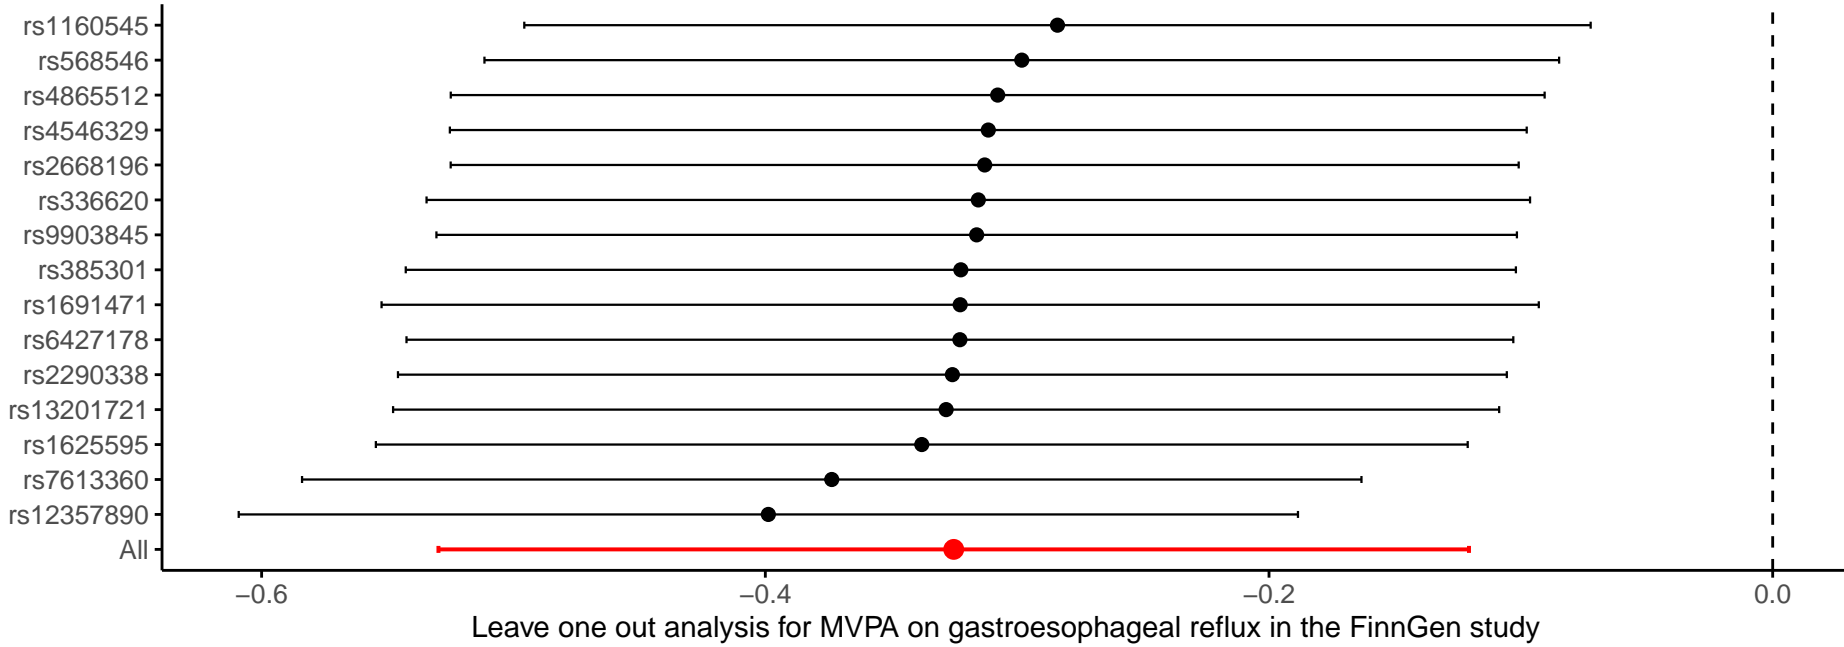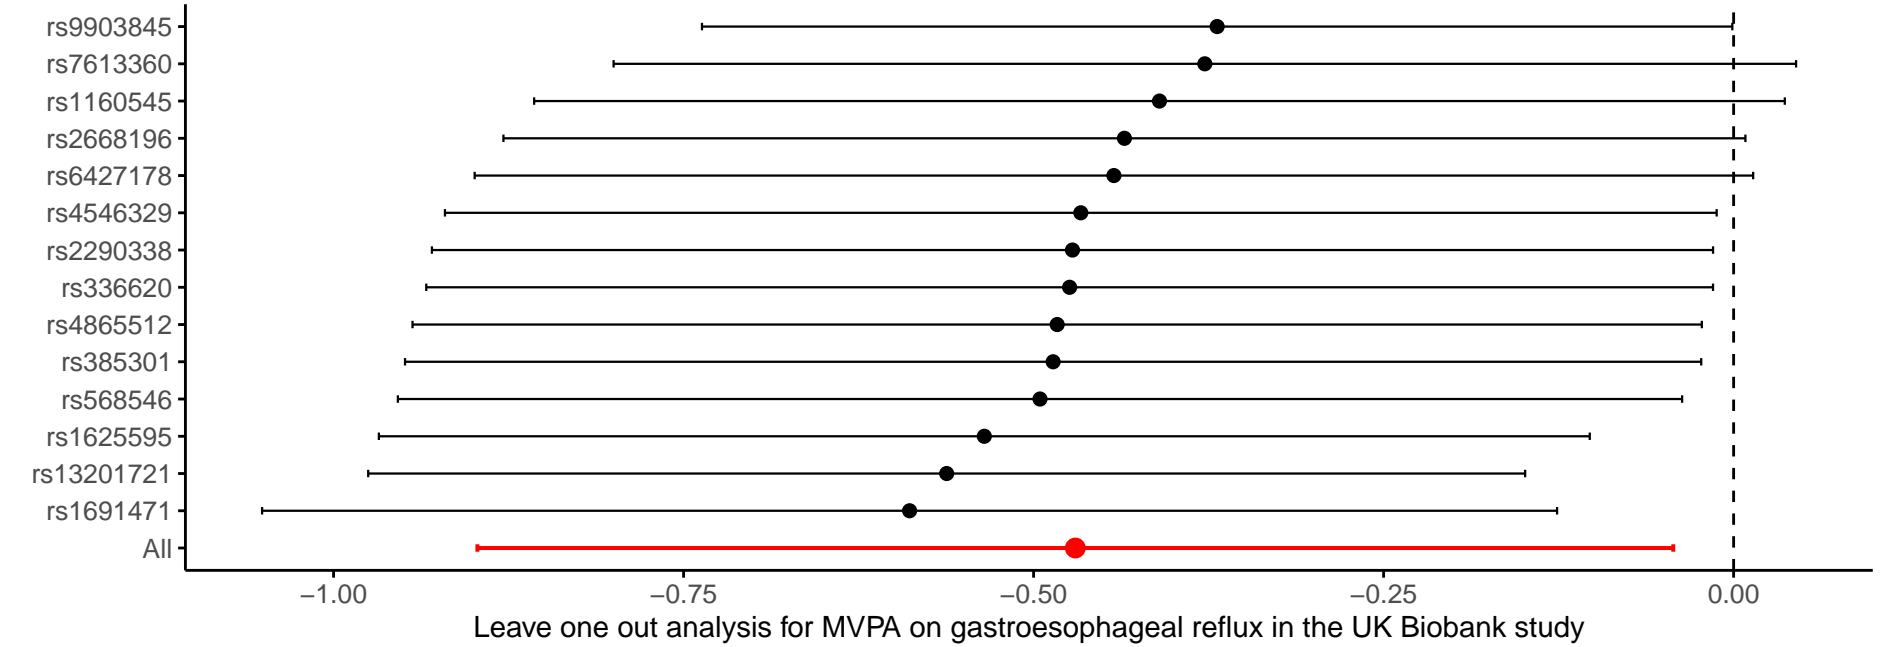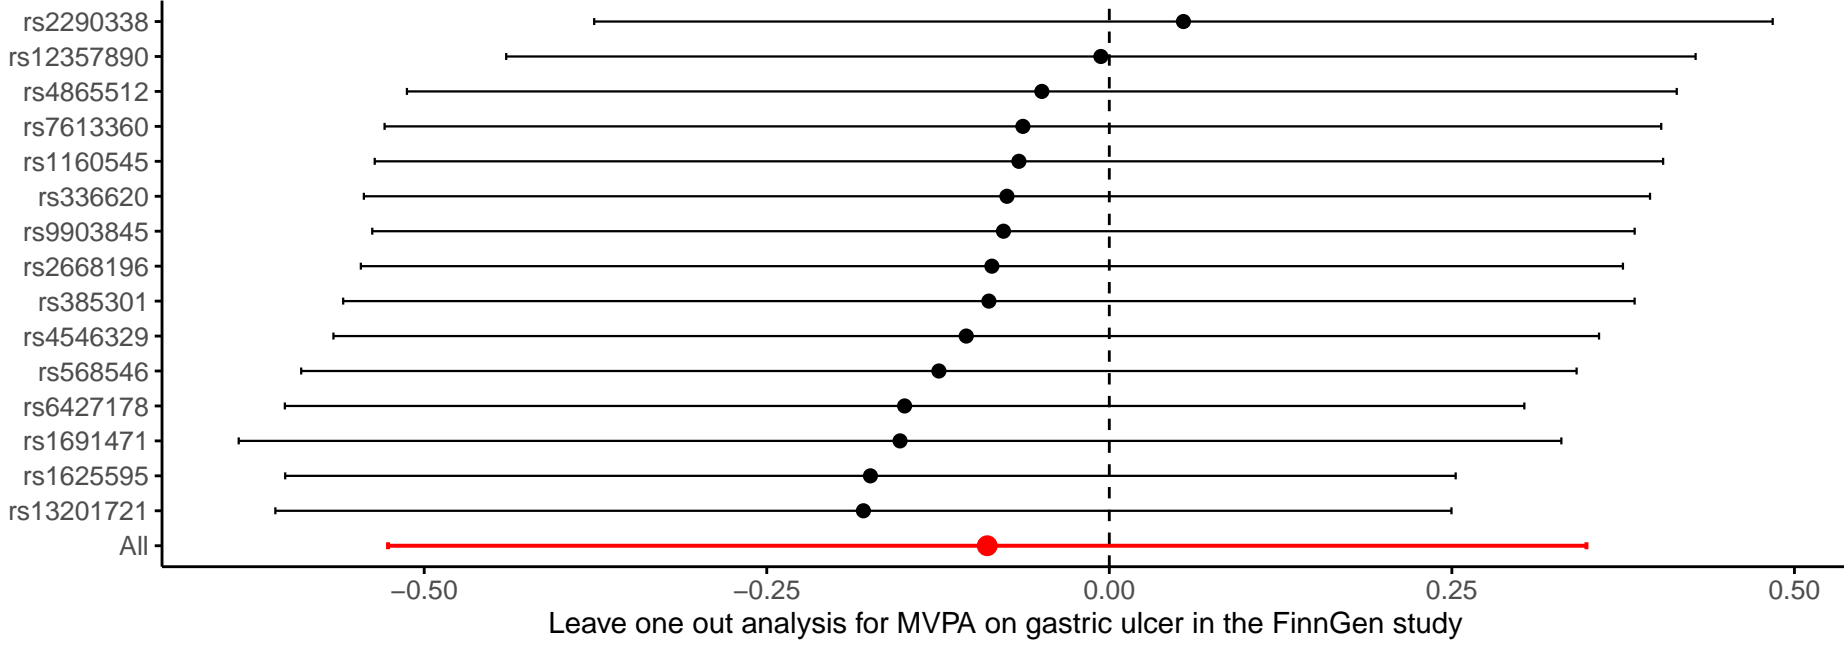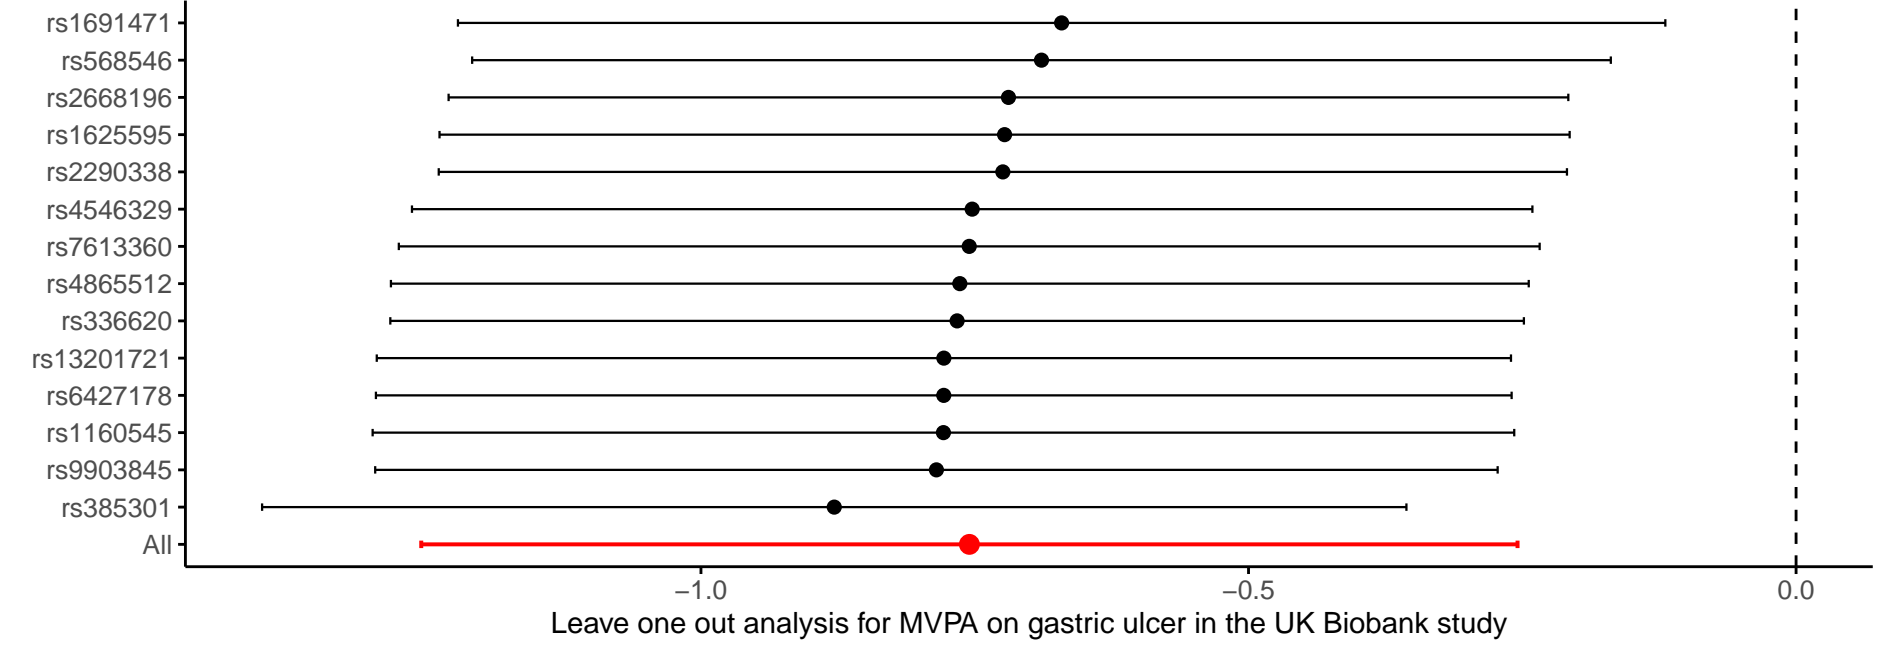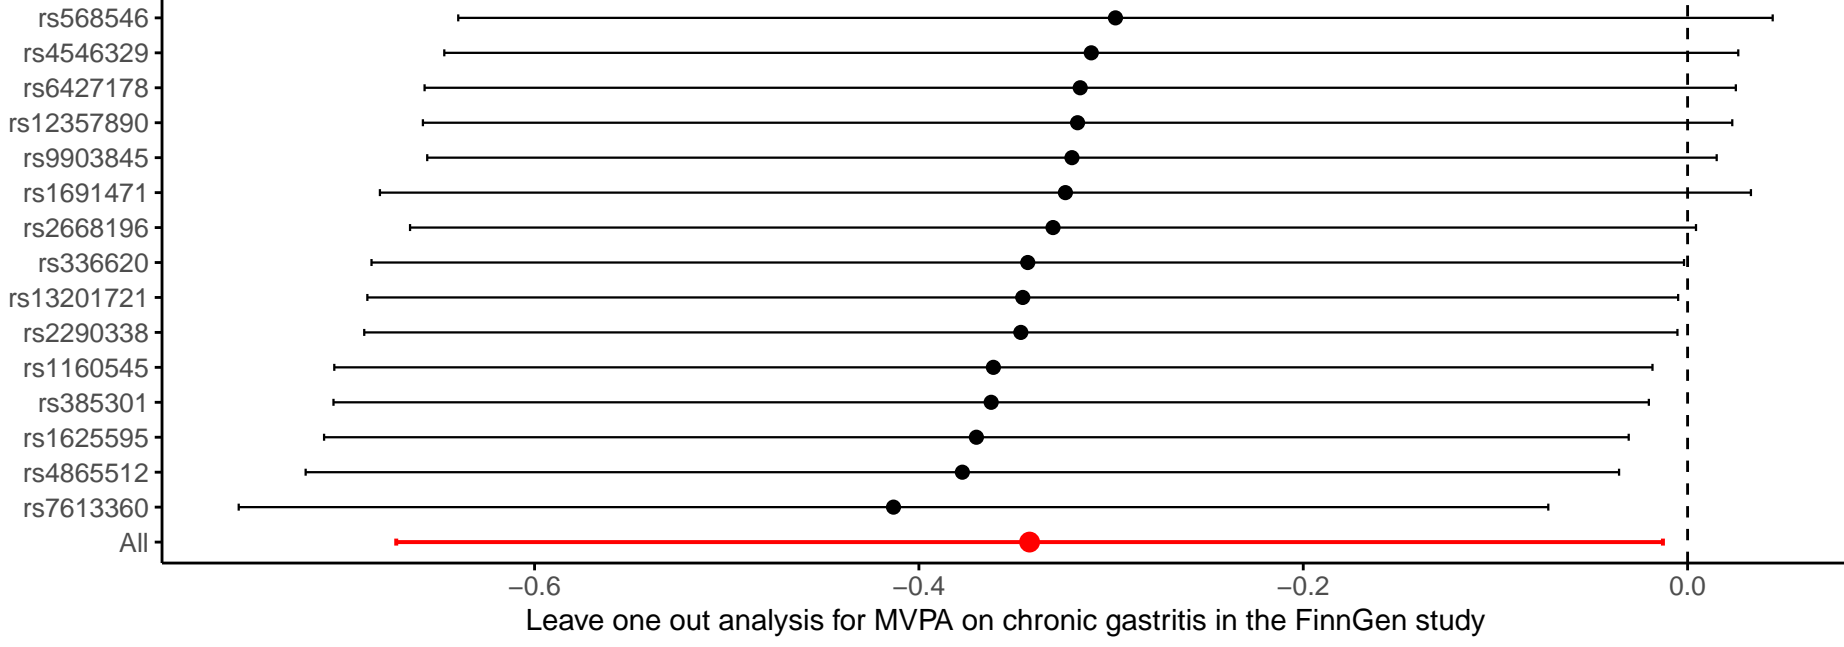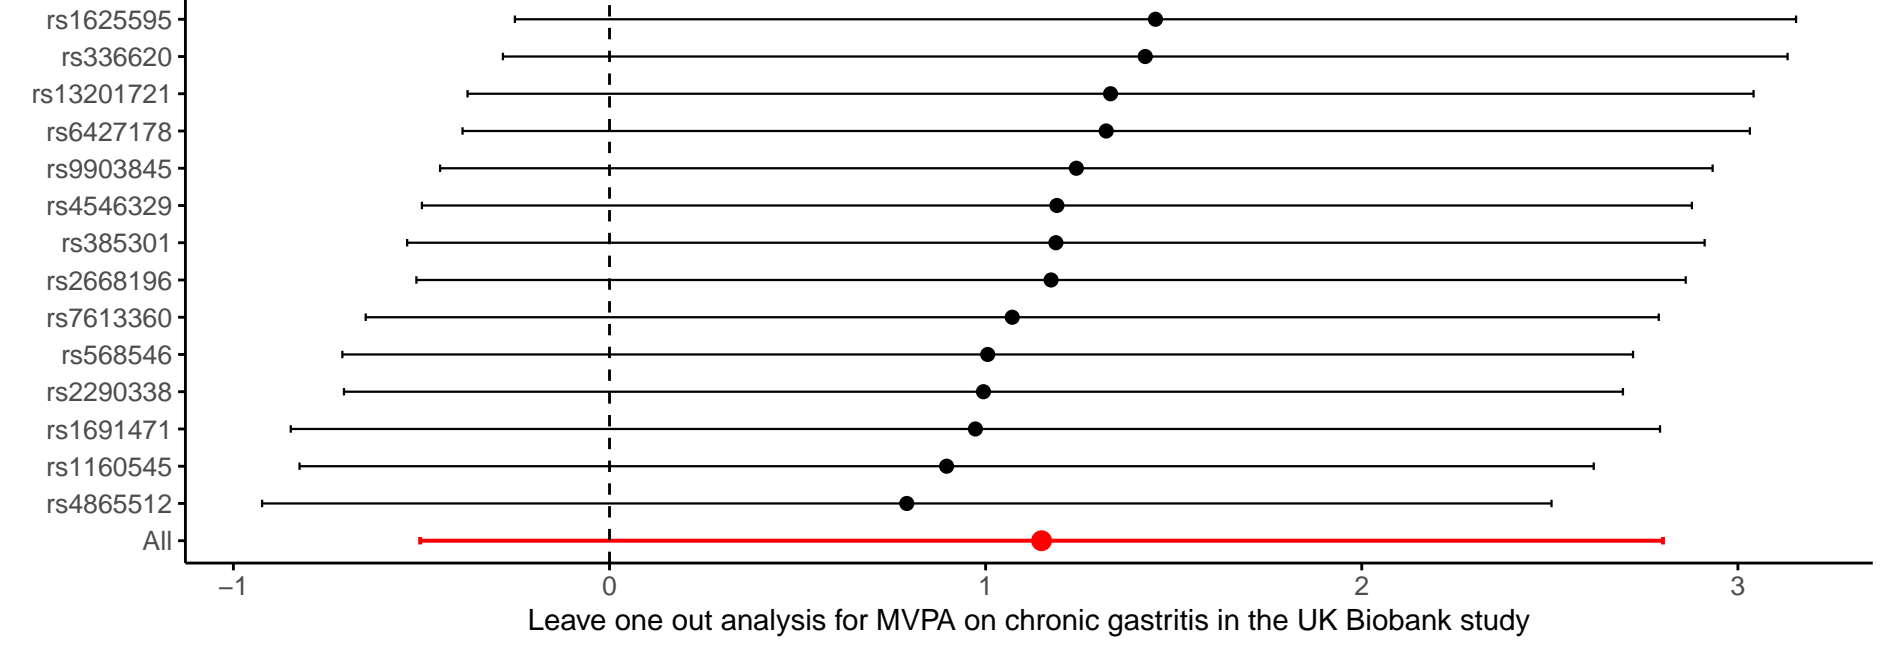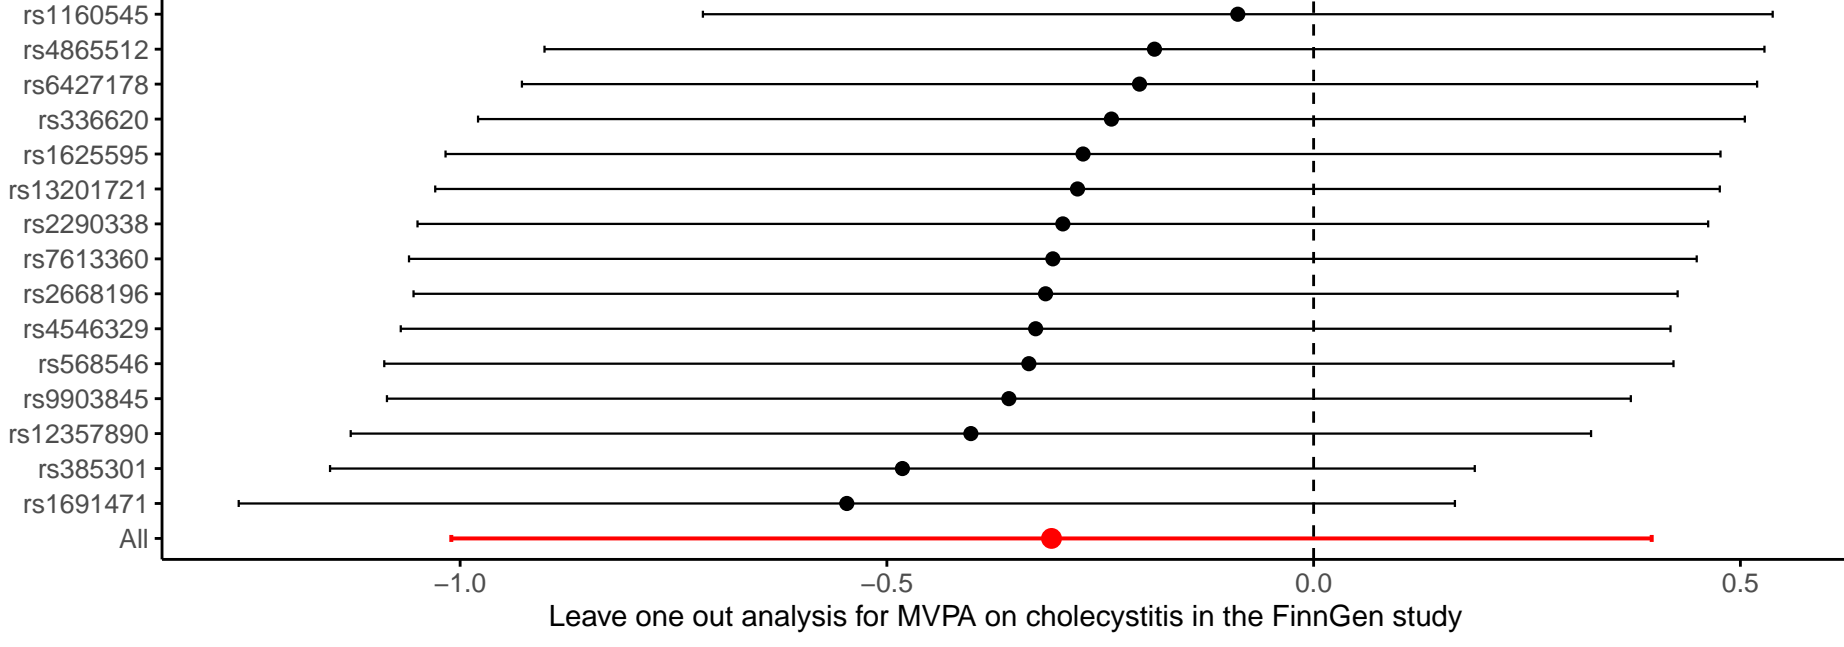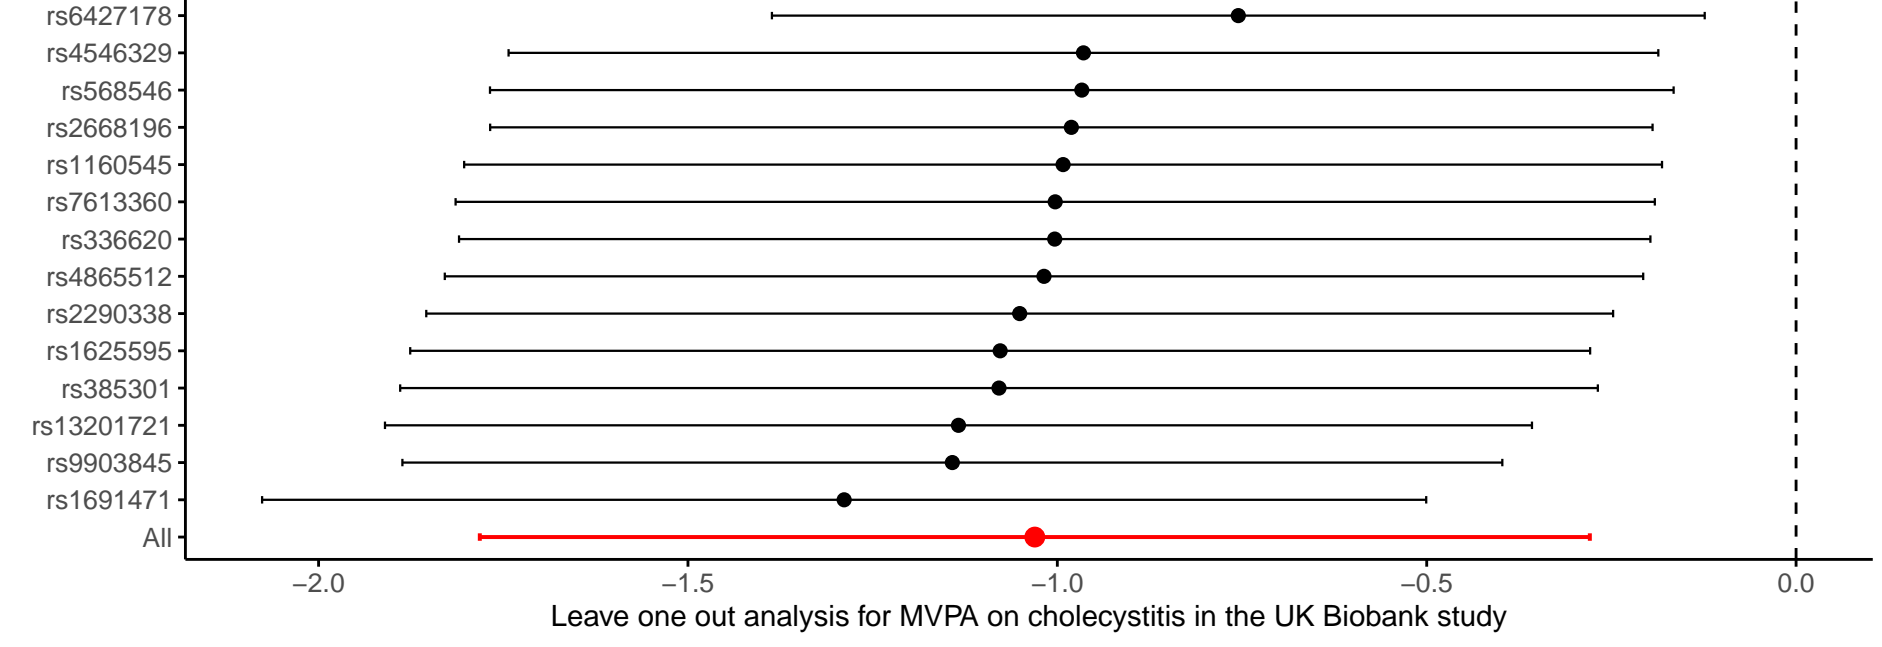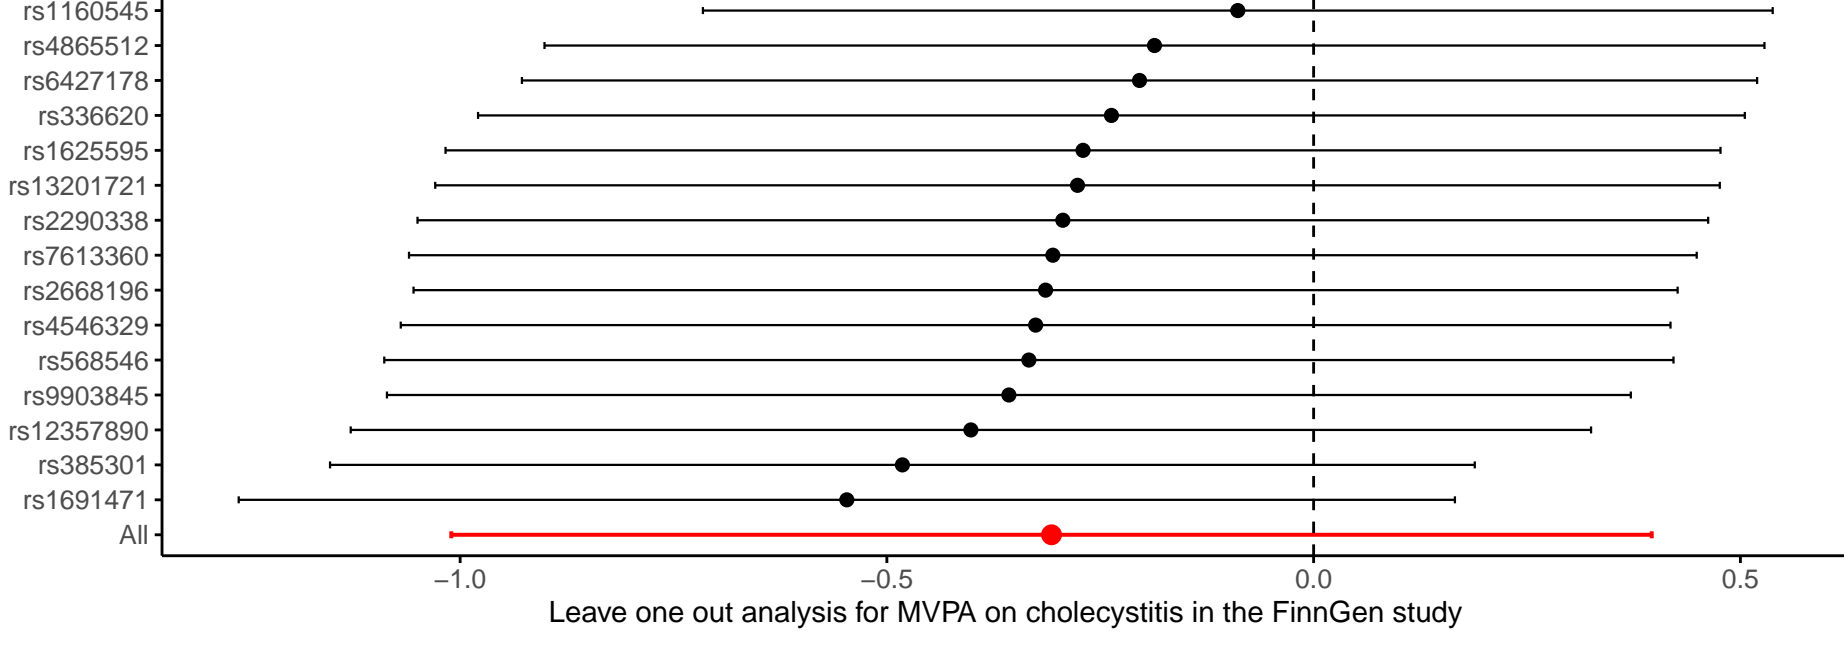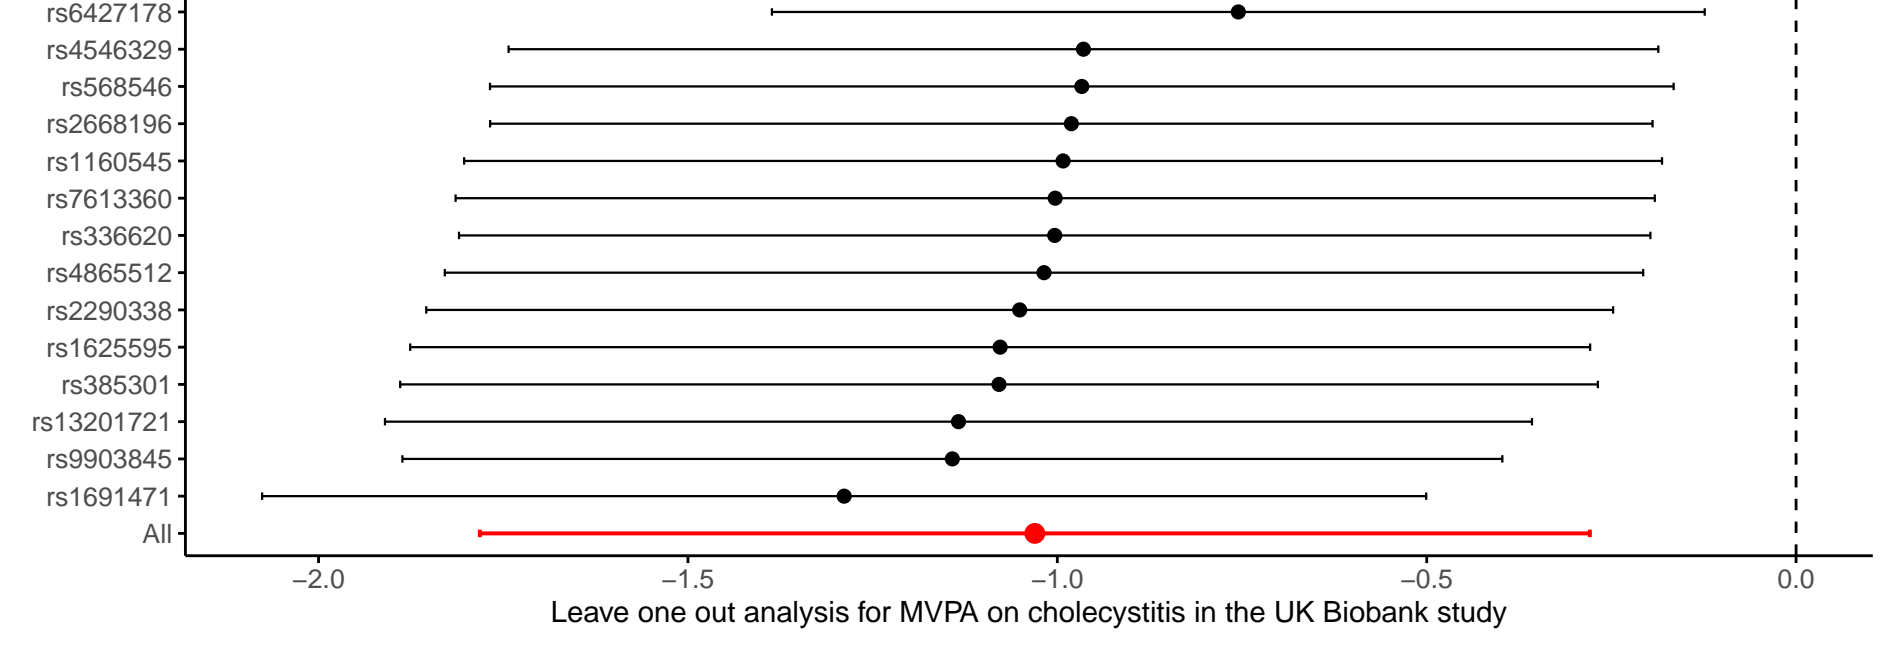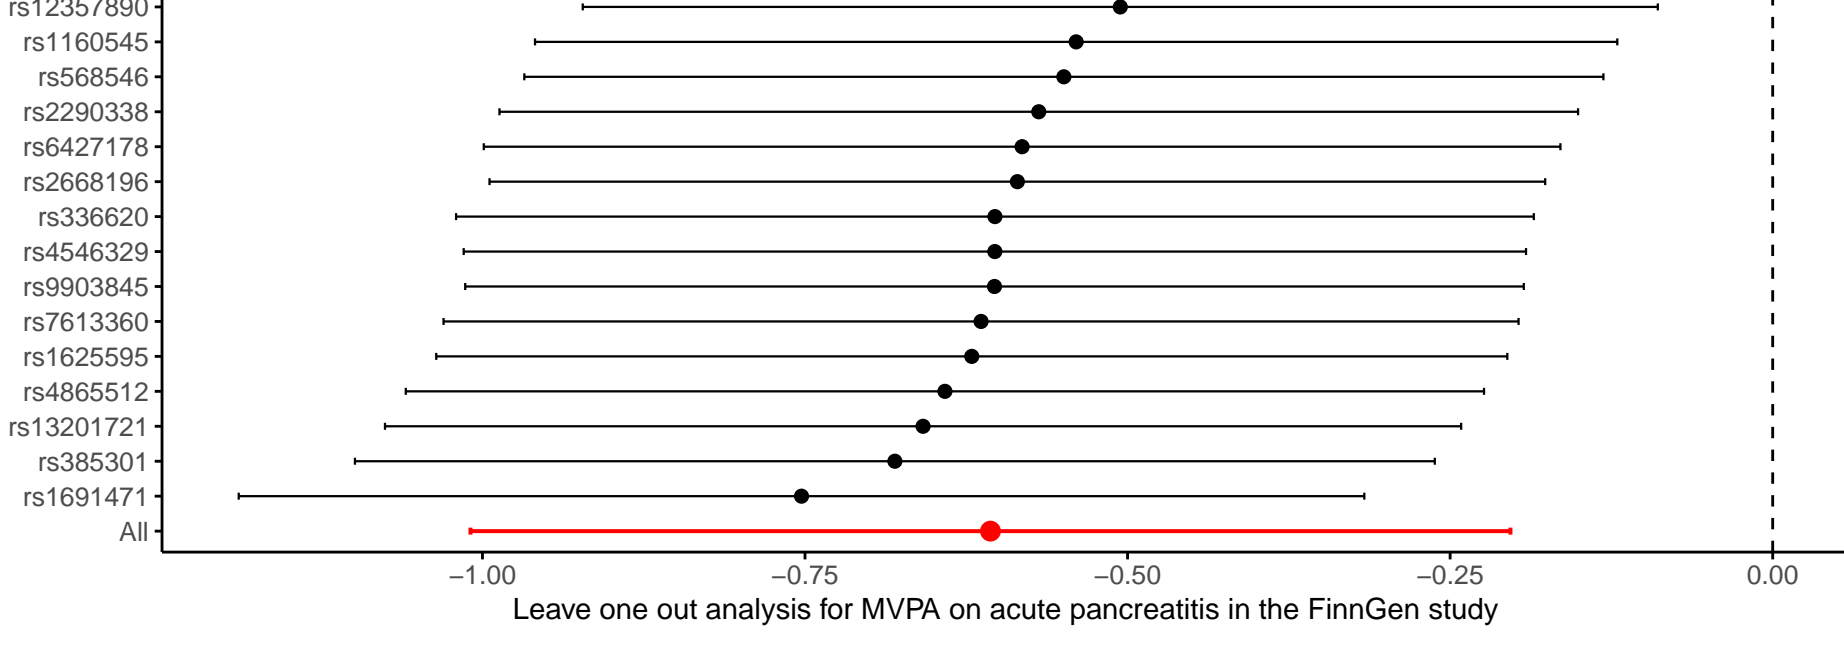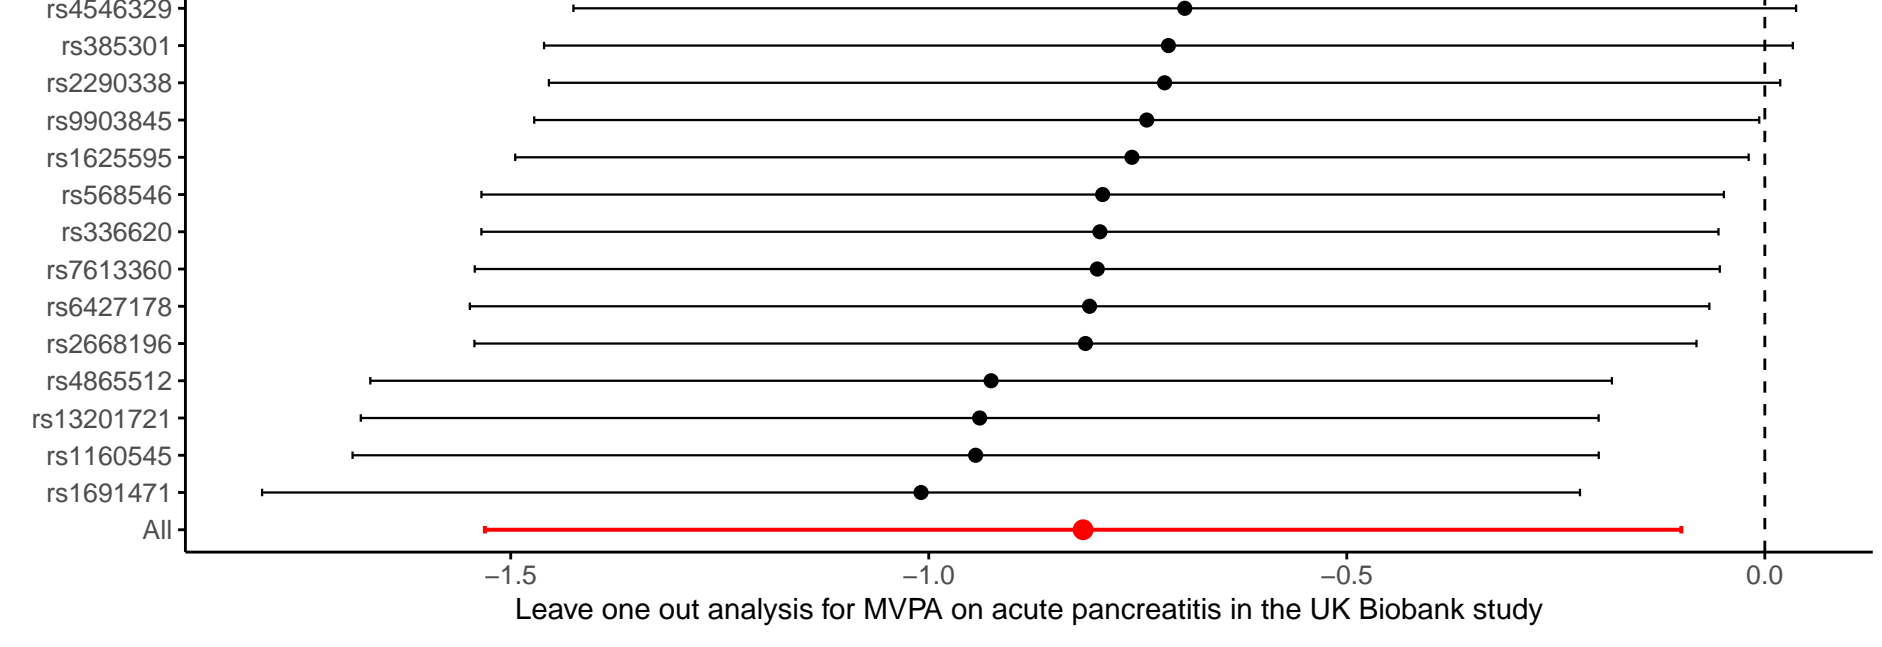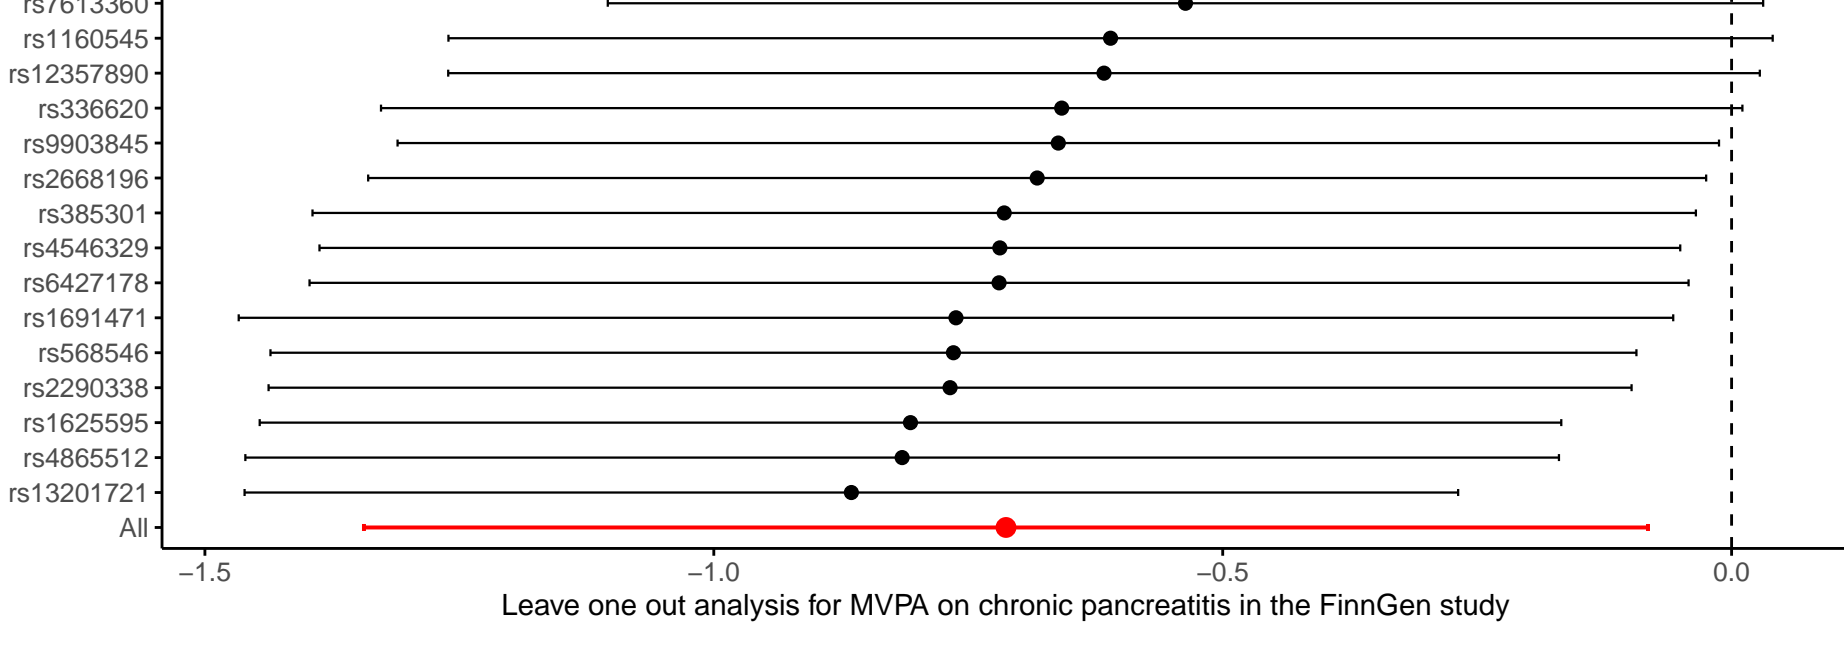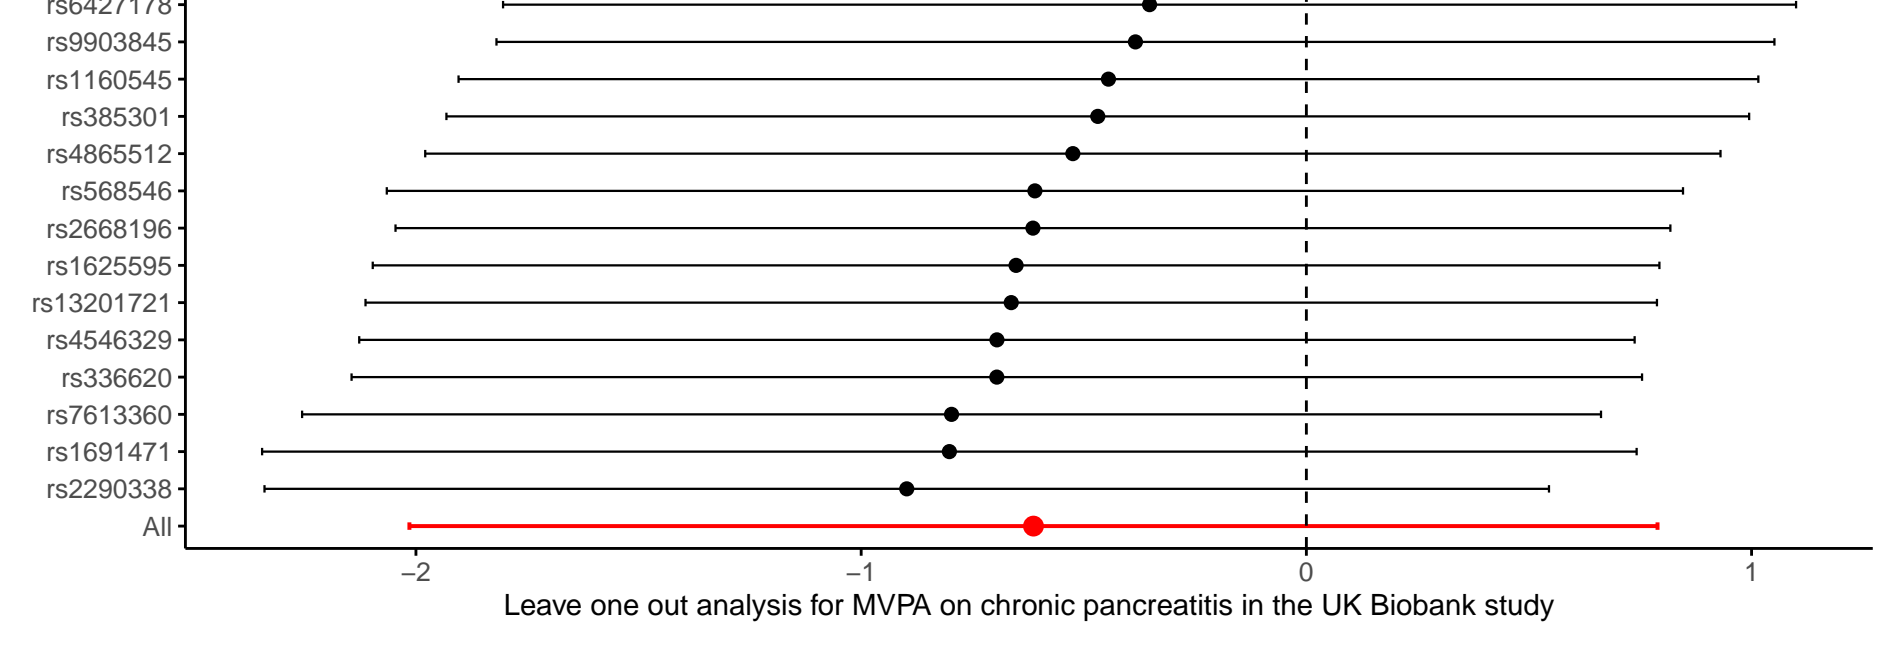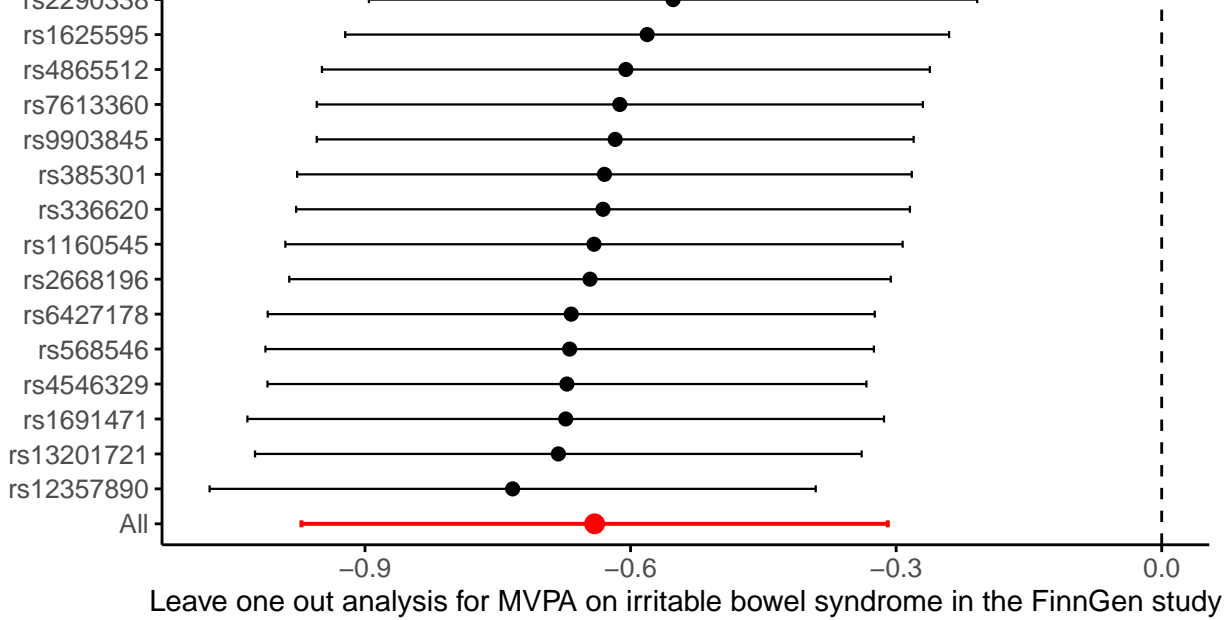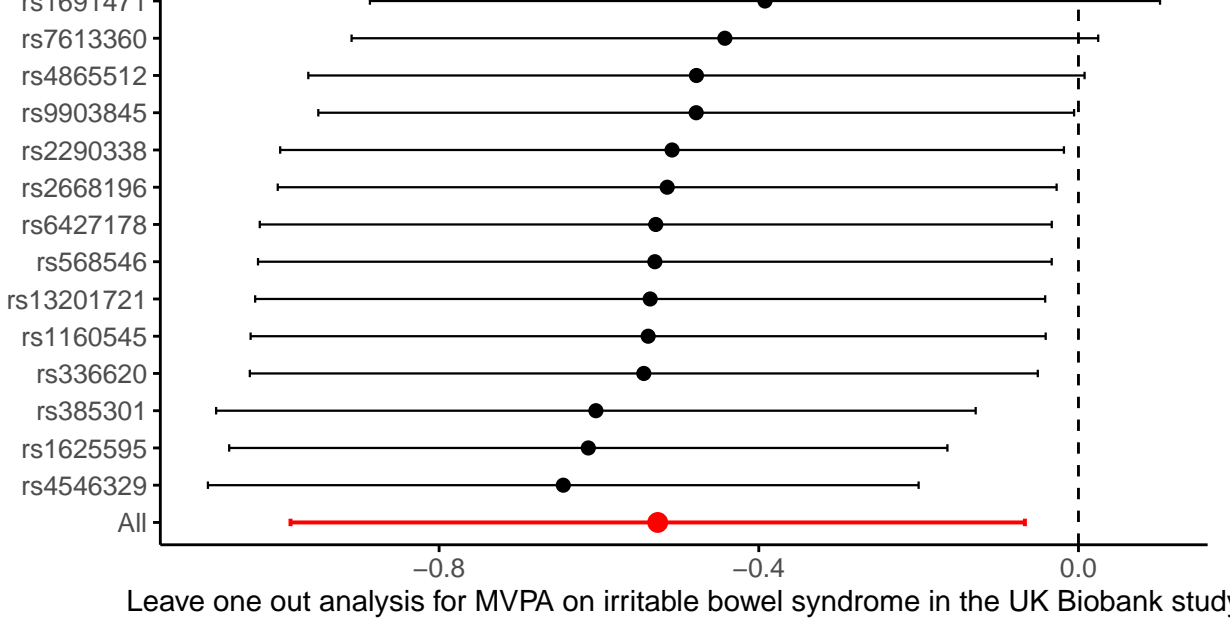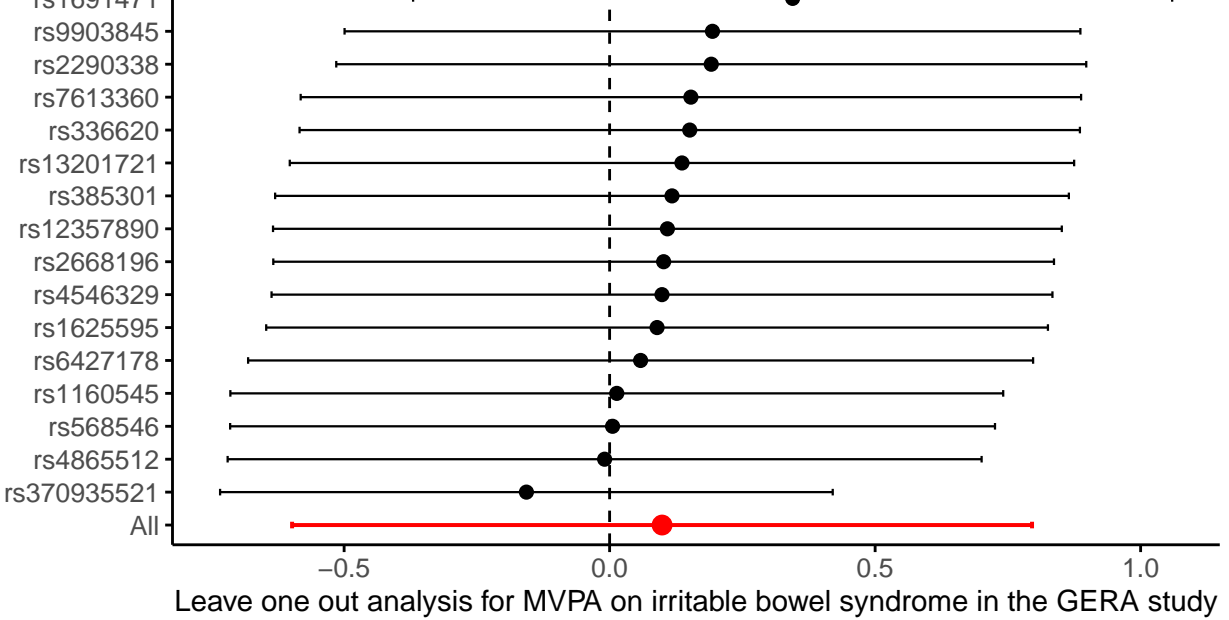

Supplement: mmc2.pdf [file mmc2.pdf]
