# Supplementary material for: Sedentary lifestyle, physical activity, and gastrointestinal diseases: evidence from mendelian randomization analysis
Source: PubMed Central journal article supplement (PMC11004085; doi:10.1016/j.ebiom.2024.105110), 2024-04-06
Supplement: mmc3.pdf [file mmc3.pdf]

|                                   | Main analysis | LD<br>r <sup>2</sup> =0.001 | Adjustment for<br>MVPA | Adjustment for<br>smoking initiation | Adjustment for<br>cigarette per day | Adjustment for<br>drinking | Adjustment for<br>BMI | Adjustment for<br>WHR | Adjustment for<br>type 2 diabetes | Adjustment for<br>fasting insulin |  | Main analysis | LD<br>r <sup>2</sup> =0.001 | Adjustment for<br>LST | Adjustment for<br>smoking initiation | Adjustment for<br>cigarette per day | Adjustment for<br>drinking | Adjustment for<br>BMI | Adjustment for<br>WHR | Adjustment for<br>type 2 diabetes | Adjustment for<br>fasting insulin |
|-----------------------------------|---------------|-----------------------------|------------------------|--------------------------------------|-------------------------------------|----------------------------|-----------------------|-----------------------|-----------------------------------|-----------------------------------|--|---------------|-----------------------------|-----------------------|--------------------------------------|-------------------------------------|----------------------------|-----------------------|-----------------------|-----------------------------------|-----------------------------------|
| Gastroesophageal reflux           | 1.28          | 1.30                        | 1.16                   | 1.25                                 | 1.26                                | 1.27                       | 1.30                  | 1.27                  | 1.31                              | 1.27                              |  | 0.70          | 0.70                        | 0.67                  | 0.65                                 | 0.70                                | 0.63                       | 0.73                  | 0.71                  | 0.69                              | 0.73                              |
| Esophageal cancer                 | 1.36          | 1.37                        | 1.17                   | 1.05                                 | 1.29                                | 1.32                       | 0.97                  | 1.04                  | 1.13                              | 1.36                              |  | 0.77          | 0.69                        | 0.50                  | 0.61                                 | 0.70                                | 0.78                       | 0.75                  | 0.80                  | 0.83                              | 0.79                              |
| Gastric ulcer                     | 1.26          | 1.20                        | 1.19                   | 1.20                                 | 1.25                                | 1.26                       | 1.35                  | 1.26                  | 1.28                              | 1.27                              |  | 0.59          | 0.69                        | 0.78                  | 0.80                                 | 0.71                                | 0.63                       | 0.71                  | 0.76                  | 0.61                              | 0.72                              |
| Duodenal ulcer                    | 1.41          | 1.46                        | 1.42                   | 1.39                                 | 1.33                                | 1.39                       | 1.37                  | 1.36                  | 1.38                              | 1.44                              |  | 0.88          | 0.80                        | 1.05                  | 0.70                                 | 0.80                                | 0.66                       | 0.63                  | 0.73                  | 0.59                              | 0.78                              |
| Acute gastritis                   | 1.15          | 1.15                        | 1.01                   | 1.05                                 | 1.13                                | 1.08                       | 1.04                  | 0.98                  | 1.06                              | 1.12                              |  | 0.68          | 0.68                        | 0.65                  | 0.74                                 | 0.74                                | 0.63                       | 0.96                  | 0.98                  | 0.66                              | 0.71                              |
| Chronic gastritis                 | 1.23          | 1.22                        | 1.14                   | 1.20                                 | 1.24                                | 1.23                       | 1.25                  | 1.26                  | 1.24                              | 1.22                              |  | 0.74          | 0.73                        | 0.74                  | 0.81                                 | 0.85                                | 0.73                       | 0.80                  | 0.77                  | 0.86                              | 0.78                              |
| Gastric cancer                    | 1.06          | 1.02                        | 1.12                   | 0.92                                 | 1.02                                | 1.01                       | 0.94                  | 1.04                  | 0.96                              | 1.06                              |  | 1.27          | 1.31                        | 1.26                  | 0.92                                 | 1.47                                | 1.09                       | 1.47                  | 1.51                  | 1.31                              | 1.43                              |
| Irritable bowel syndrome          | 1.24          | 1.25                        | 1.09                   | 1.24                                 | 1.25                                | 1.25                       | 1.26                  | 1.26                  | 1.25                              | 1.25                              |  | 0.60          | 0.62                        | 0.62                  | 0.64                                 | 0.53                                | 0.62                       | 0.72                  | 0.73                  | 0.65                              | 0.65                              |
| Celiac disease                    | 0.96          | 0.95                        | 0.88                   | 0.94                                 | 0.95                                | 0.94                       | 0.81                  | 0.74                  | 0.85                              | 0.96                              |  | 0.84          | 0.89                        | 0.68                  | 0.78                                 | 0.93                                | 0.94                       | 0.47                  | 1.07                  | 0.53                              | 0.78                              |
| Diverticular disease              | 1.26          | 1.27                        | 1.21                   | 1.23                                 | 1.25                                | 1.25                       | 1.24                  | 1.22                  | 1.26                              | 1.28                              |  | 0.83          | 0.84                        | 0.86                  | 0.80                                 | 0.83                                | 0.83                       | 0.81                  | 0.89                  | 0.76                              | 0.77                              |
| Crohn's disease                   | 1.18          | 1.11                        | 1.09                   | 1.22                                 | 1.21                                | 1.27                       | 1.16                  | 1.22                  | 1.25                              | 1.23                              |  | 0.69          | 0.65                        | 0.65                  | 0.73                                 | 0.73                                | 0.73                       | 0.68                  | 0.79                  | 0.67                              | 0.73                              |
| Ulcerative colitis                | 1.18          | 1.13                        | 1.06                   | 1.14                                 | 1.11                                | 1.15                       | 1.17                  | 1.17                  | 1.16                              | 1.13                              |  | 1.15          | 1.14                        | 0.80                  | 0.86                                 | 1.02                                | 1.11                       | 0.71                  | 0.93                  | 0.96                              | 1.16                              |
| Colorectal cancer                 | 0.98          | 0.96                        | 1.01                   | 1.00                                 | 0.99                                | 0.98                       | 0.97                  | 0.87                  | 1.02                              | 0.97                              |  | 1.05          | 1.06                        | 1.08                  | 1.05                                 | 1.09                                | 0.99                       | 0.86                  | 1.07                  | 0.94                              | 1.06                              |
| Non-alcoholic fatty liver disease | 1.61          | 1.56                        | 1.57                   | 1.53                                 | 1.55                                | 1.53                       | 1.40                  | 1.31                  | 1.59                              | 1.66                              |  | 0.68          | 0.70                        | 0.93                  | 0.62                                 | 0.58                                | 0.60                       | 0.71                  | 0.70                  | 0.80                              | 0.84                              |
| Alcoholic liver disease           | 1.24          | 1.27                        | 1.15                   | 1.03                                 | 1.24                                | 1.23                       | 1.23                  | 1.34                  | 1.30                              | 1.20                              |  | 0.78          | 0.95                        | 0.78                  | 0.74                                 | 0.70                                | 0.47                       | 0.72                  | 0.55                  | 0.66                              | 0.73                              |
| Cirrhosis                         | 1.18          | 1.18                        | 1.20                   | 1.11                                 | 1.20                                | 1.17                       | 1.16                  | 1.23                  | 1.22                              | 1.17                              |  | 1.09          | 1.29                        | 1.04                  | 0.83                                 | 0.93                                | 0.99                       | 0.82                  | 0.72                  | 0.82                              | 1.10                              |
| Liver cancer                      | 1.00          | 1.05                        | 0.91                   | 1.07                                 | 1.02                                | 1.04                       | 1.36                  | 1.08                  | 1.24                              | 0.99                              |  | 0.54          | 0.45                        | 0.60                  | 0.41                                 | 0.35                                | 0.56                       | 0.70                  | 0.63                  | 0.52                              | 0.91                              |
| Cholangitis                       | 1.36          | 1.28                        | 1.28                   | 1.22                                 | 1.34                                | 1.36                       | 1.23                  | 1.32                  | 1.35                              | 1.32                              |  | 0.73          | 0.75                        | 0.81                  | 0.72                                 | 0.69                                | 0.60                       | 0.82                  | 1.29                  | 0.84                              | 0.67                              |
| Cholecystitis                     | 1.31          | 1.26                        | 1.16                   | 1.23                                 | 1.28                                | 1.27                       | 1.23                  | 1.30                  | 1.34                              | 1.33                              |  | 0.52          | 0.52                        | 0.68                  | 0.54                                 | 0.53                                | 0.57                       | 0.63                  | 0.63                  | 0.56                              | 0.56                              |
| Cholelithiasis                    | 1.32          | 1.31                        | 1.17                   | 1.32                                 | 1.29                                | 1.32                       | 1.19                  | 1.26                  | 1.33                              | 1.31                              |  | 0.61          | 0.61                        | 0.62                  | 0.70                                 | 0.66                                | 0.65                       | 0.83                  | 0.83                  | 0.72                              | 0.61                              |
| Acute pancreatitis                | 1.39          | 1.39                        | 1.27                   | 1.32                                 | 1.32                                | 1.34                       | 1.39                  | 1.28                  | 1.39                              | 1.40                              |  | 0.52          | 0.54                        | 0.66                  | 0.71                                 | 0.56                                | 0.64                       | 0.68                  | 0.81                  | 0.54                              | 0.56                              |
| Chronic pancreatitis              | 1.47          | 1.39                        | 1.37                   | 1.34                                 | 1.40                                | 1.41                       | 1.32                  | 1.36                  | 1.49                              | 1.50                              |  | 0.50          | 0.45                        | 0.78                  | 0.69                                 | 0.58                                | 0.61                       | 0.70                  | 0.64                  | 0.47                              | 0.53                              |
| Pancreatic cancer                 | 1.09          | 1.09                        | 1.05                   | 1.03                                 | 1.06                                | 1.12                       | 1.03                  | 1.09                  | 1.12                              | 1.12                              |  | 0.83          | 0.79                        | 0.93                  | 1.16                                 | 0.90                                | 0.98                       | 0.93                  | 1.55                  | 1.39                              | 0.74                              |
| Acute appendicitis                | 1.09          | 1.08                        | 1.08                   | 1.09                                 | 1.09                                | 1.08                       | 1.05                  | 1.09                  | 1.09                              | 1.08                              |  | 0.83          | 0.84                        | 0.95                  | 0.78                                 | 0.81                                | 0.87                       | 0.87                  | 0.86                  | 0.87                              | 0.89                              |
